# Supplementary material for: Dietary Dihydroartemisinin Supplementation Attenuates Hepatic Oxidative Damage of Weaned Piglets with Intrauterine Growth Retardation through the Nrf2/ARE Signaling Pathway
Source: MDPI journal article supplement (doi:10.3390/ani9121144), 2019-12-13
Supplement: s1 [file s1]

# Supplementary Materials: Dietary Dihydroartemisinin Supplementation Attenuates Hepatic Oxidative Damage of Weaned Piglets with Intrauterine Growth Retardation through the Nrf2/ARE Signaling Pathway

Yongwei Zhao, Yu Niu, Jintian He, Lili Zhang, Chao Wang and Tian Wang \*

College of Animal Science and Technology, Nanjing Agricultural University, No. 6, Tongwei Road, Xuanwu District, Nanjing 210095, China; zhaoyongweinjau@163.com (Y.Z.); niuyu0227@126.com (Y.N.); 15150537273@163.com (J.H.); zhanglili@njau.edu.cn (L.Z.); wangchao121@njau.edu.cn (C.W.)

\* Correspondence: tianwangnjau@163.com; Tel./Fax: +86-025-84395156

**Table S1.** Effects of dietary dihydroartemisinin supplementation on growth performance of IUGR weaned piglets.

| Item †           | Experiment Groups         |                           |                           |
|------------------|---------------------------|---------------------------|---------------------------|
|                  | NBW                       | IUGR                      | IUGR-DHA                  |
| BW (kg): 21 days | 6.96 ± 0.05 <sup>a</sup>  | 6.08 ± 0.09 <sup>b</sup>  | 6.08 ± 0.06 <sup>b</sup>  |
| BW (kg): 49 days | 12.80 ± 0.60 <sup>a</sup> | 10.24 ± 0.38 <sup>b</sup> | 12.11 ± 0.46 <sup>a</sup> |
| BWG (kg)         | 5.84 ± 0.62 <sup>a</sup>  | 4.17 ± 0.35 <sup>b</sup>  | 6.03 ± 0.49 <sup>a</sup>  |
| FI (kg)          | 8.00 ± 0.13 <sup>b</sup>  | 6.55 ± 0.15 <sup>c</sup>  | 9.13 ± 0.13 <sup>a</sup>  |
| G:F (kg/kg)      | 0.73 ± 0.08               | 0.64 ± 0.06               | 0.66 ± 0.06               |

<sup>a,b,c</sup> Mean values within a row with unlike superscript letters were significantly different ( $p < 0.05$ ). Values were means and standard errors ( $n = 8$ ). † NBW, normal birth weight group given a basal diet; IUGR, Intrauterine growth retardation group given a basal diet; IUGR-DHA, IUGR group given diets supplemented with 80 mg/kg dihydroartemisinin; BW, body weight; BWG, body weight gain; FI, feed intake; G:F, body weight gain: feed intake.
